# Supplementary material
Source: PubMed Central journal article supplement (PMC9275793)

# THE LANCET

## Rheumatology

### Supplementary appendix

This appendix formed part of the original submission. We post it as supplied by the authors.

Supplement to: Saxena A, Engel AJ, Banbury B, et al. Breakthrough SARS-CoV-2 infections, morbidity, and seroreactivity following initial COVID-19 vaccination series and additional dose in patients with SLE in New York City. *Lancet Rheumatol* 2022; published online July 12. [https://doi.org/10.1016/S2665-9913\(22\)00190-4](https://doi.org/10.1016/S2665-9913(22)00190-4).

**TABLE OF CONTENTS**

|                                                                                                                                                                    |             |
|--------------------------------------------------------------------------------------------------------------------------------------------------------------------|-------------|
| <b>PATIENTS AND METHODS.....</b>                                                                                                                                   | <b>p 1</b>  |
| <b>APPENDIX REFERENCES.....</b>                                                                                                                                    | <b>p 4</b>  |
| <b>APPENDIX TABLE 1: CLINICAL DEMOGRAPHICS AND MEDICATION HISTORY.....</b>                                                                                         | <b>p 5</b>  |
| <b>APPENDIX TABLE 2: PATIENTS HOSPITALIZED WITH COVID-19 BREAKTHROUGH INFECTION AFTER VACCINATION.....</b>                                                         | <b>p 7</b>  |
| <b>APPENDIX TABLE 3: FACTORS ASSOCIATED WITH SARS-COV-2 SPIKE ANTIBODY TITER IN SLE PATIENTS AFTER ADDITIONAL COVID-19 VACCINATION DOSE.....</b>                   | <b>p 8</b>  |
| <b>FIGURE 1: SARS-COV-2 INFECTIONS IN INITIALLY VACCINATED SLE PATIENTS AMONG THOSE THAT RECEIVED AND DID NOT RECEIVE AN ADDITIONAL COVID-19 VACCINE DOSE.....</b> | <b>p 9</b>  |
| <b>FIGURE 2: SARS-COV-2 SPIKE ANTIBODY ELISA BEFORE AND AFTER INITIAL COVID-19 VACCINE SERIES AND ADDITIONAL DOSE.....</b>                                         | <b>p 10</b> |

## **PATIENTS AND METHODS**

### **Study Cohort**

Details of patients included in this study and data on the first 90 SLE patients after the initial vaccine series have been previously published.<sup>1</sup> In brief, a convenience sample from the established New York University (NYU) Lupus Cohort was recruited. Inclusion in the NYU Lupus cohort required 1) fulfilling at least one of the following classification criteria: a) the American College of Rheumatology (ACR) revised classification criteria<sup>2</sup>; b) the Systemic Lupus International Collaborating Clinics (SLICC) classification criteria<sup>3</sup>; c) the European League Against Rheumatism (EULAR)/ACR classification criteria<sup>4</sup>; and 2) age  $\geq$  18 years. Having met one if the above criteria, enrollment required 1) receipt of two doses of an mRNA vaccine (BNT162b2 [Pfizer/BioNTech] or mRNA-1273 [Moderna]) or one dose of a vector based COVID-19 vaccine (Ad26.COV2.S [Johnson & Johnson]); 2) willingness to provide blood samples after vaccination; 3) clinical follow-up  $\geq$  6 months after initial vaccination series or until SARS-CoV-2 infection if earlier than 6 months; 4) clinical follow up on or after February 4, 2022. All patients signed an informed consent available in English, Spanish and Mandarin. Patients consented to the study as approved by the NYU IRB #s14-00487.

### **Data Collection**

The following clinical information was recorded as previously described:<sup>1</sup> 1) demographic factors (age, sex, race/ethnicity); 2) history of lupus nephritis; 3) use of SLE specific medications, including antimalarials, glucocorticoids and immunosuppressants.

COVID-19 infections after vaccination were evaluated in 163 subjects from patient encounters at regularly scheduled visits and chart review of the NYU and Bellevue Hospital Center electronic medical record with last patient follow-up recorded April 24 2022. Positive polymerase chain reaction (PCR) or antigen-based testing was required for documentation, either performed at the clinical site or self-reported. Data collected on COVID-19 disease outcomes included 1) hospitalization; 2) death; 3) COVID-19 specific treatments, including high flow oxygen, mechanical ventilation, glucocorticoids, monoclonal antibody, and/or antiviral use; 4) type of testing (if discordant between PCR and antigen testing, only PCR positive cases were counted); 5) time of infection in relation to the most recent vaccination dose.

Fifty-seven patients receiving additional vaccine doses were followed longitudinally with blood samples available after the initial vaccine series (time point (TP) 2, mean 30.2, range 5-86 days after the second dose of the mRNA vaccines or the single dose of the vector vaccine) and after the additional dose (TP4, mean 44.7 (range 5-147) days after the additional dose). A subset of these patients (N=26) had blood obtained prior to the initial (TP 1) and additional dose (TP3, mean 175.5 (range 90-270) days after the initial vaccine series).

### **ELISA-Recombinant SARS-CoV-2 Spike Protein**

The test antigen was recombinant SARS-CoV-2 spike receptor binding domain (RBD) (# BT10500; R&D Systems), coated onto a 96-well microtiter plate for 2 hours at 37 degrees Celsius. Plate blocking occurred at room temperature for 1 hour. All subject sera were applied at dilutions ranging from 1:200-1:1000 for 1.5 hours at room temperature. Samples were run in duplicate. For each 96-well plate there were 2 high positive controls from TP2, 1 low positive

and 1 calibrator. Detection relied on established use of a secondary antibody (enzyme-labeled secondary antibody, alkaline phosphatase–conjugated rabbit anti-human IgG ( $\gamma$ -chain–specific) (Sigma #A3312) at 1:3000), which was incubated for 30 minutes at room temperature. An alkaline phosphate reagent was used for development in 5 minute intervals. Developing occurred within 15-25 minutes to report results. Reactions readings were stopped when the calibrator reached an optical density (OD) of 1. The test sera titers were retrieved within a range from 0.3-1.0 OD. The sera titers were multiplied by the dilution factor. Importantly, the series of sera from each patient were always run on the same plate. Data are shown as units per ml (u/mL).

### **Statistical Analysis**

Categorical variables were summarized by computing counts and proportions of patients (%). Continuous variables are expressed as mean, median with interquartile range (IQR), or range, as appropriate. Two group comparisons were performed using the Chi-square or Fisher's exact tests for categorical variables and the two-sample Mann-Whitney U tests for continuous variables. Low post-vaccine ELISA antibody response was defined as  $\leq 100$  units/ml, the lowest value seen in controls in our previous study.<sup>1</sup> All statistical analyses were performed using IBM SPSS Statistics version 25.

### **Role of the Funding Source**

The funding sources for this study did not have any role in the study design, data collection, analysis, interpretation, writing of the report, or decision to submit the paper for publication.

**APPENDIX REFERENCES**

- 1 Izmirly PM, Kim MY, Samanovic M, *et al.* Title: Evaluation of Immune Response and Disease Status in SLE Patients Following SARS-CoV-2 Vaccination. DOI:10.1002/ART.41937.
- 2 Hochberg MC. Updating the American College of Rheumatology revised criteria for the classification of systemic lupus erythematosus. *Arthritis Rheum.* 1997; **40**: 1725.
- 3 Petri M, Orbai AM, Alarcón GS, *et al.* Derivation and validation of the systemic lupus international collaborating clinics classification criteria for systemic lupus erythematosus. *Arthritis Rheum* 2012; **64**: 2677–86.
- 4 Aringer M, Costenbader K, Daikh D, *et al.* 2019 European League Against Rheumatism/American College of Rheumatology Classification Criteria for Systemic Lupus Erythematosus. *Arthritis Rheumatol* 2019. DOI:10.1002/art.40930.

**Appendix Table 1: Clinical Demographics and Medication History**

|                                                                  | <b>SLE at Time<br/>Of Initial Vaccine<br/>(n = 163)</b> | <b>SLE at Time<br/>Of Additional<br/>Vaccine Dose<br/>(n = 125)</b> |
|------------------------------------------------------------------|---------------------------------------------------------|---------------------------------------------------------------------|
| Age, mean (range)                                                | 44.1 (22-87)                                            | 45.2 (22-87)                                                        |
| Sex                                                              |                                                         |                                                                     |
| Female                                                           | 149 (91.4%)                                             | 116 (92.8%)                                                         |
| Male                                                             | 14 (8.6%)                                               | 9 (7.2%)                                                            |
| Race                                                             |                                                         |                                                                     |
| White                                                            | 64 (39.3%)                                              | 53 (42.4%)                                                          |
| Black                                                            | 39 (23.9%)                                              | 28 (22.4%)                                                          |
| Asian                                                            | 39 (23.9%)                                              | 27 (21.6%)                                                          |
| Other                                                            | 21 (12.9%)                                              | 17 (13.6%)                                                          |
| Ethnicity                                                        |                                                         |                                                                     |
| Hispanic/Latino                                                  | 56 (34.4%)                                              | 44 (35.2%)                                                          |
| Initial and additional COVID-19 vaccine                          |                                                         |                                                                     |
| Pfizer                                                           | 122 (74.8%)                                             | 96 (76.8%)                                                          |
| Moderna                                                          | 35 (21.5%)                                              | 27 (21.6%)                                                          |
| Janssen/Johnson & Johnson                                        | 6 (3.7%)                                                | 0 (0%)                                                              |
| Unknown                                                          | 0 (0%)                                                  | 2 (1.6%)                                                            |
| History of COVID-19 (PCR or IgG) prior to<br>initial vaccination | 28 (17.2%)                                              | 19 (15.2%)                                                          |
| History of LN                                                    | 80 (49.1%)                                              | 63 (50.4%)                                                          |
| Medications at time of initial or additional<br>vaccine          |                                                         |                                                                     |
| Hydroxychloroquine                                               | 139 (85.3%)                                             | 104 (83.2%)                                                         |
| Mean dose (mg)                                                   | 324.9                                                   | 351.9                                                               |
| Chloroquine                                                      | 1 (0.6%)                                                | 0 (0%)                                                              |
| Mean dose (mg)                                                   | 250.0                                                   | 0                                                                   |
| Glucocorticoids                                                  | 52 (31.9%)                                              | 39 (31.2%)                                                          |
| Mean dose, prednisone equivalent<br>(mg)                         | 8.7                                                     | 6.8                                                                 |
| At least 1 immunosuppressant                                     | 82 (50.3%)                                              | 62 (50.4%)                                                          |
| Azathioprine                                                     | 17 (10.4%)                                              | 9 (7.2%)                                                            |
| Mean dose (mg)                                                   | 98.5                                                    | 104.2                                                               |
| Mycophenolate mofetil                                            | 43 (26.4%)                                              | 37 (29.6%)                                                          |
| Mean dose (mg)                                                   | 1924.2                                                  | 2007.9                                                              |
| Mycophenolic acid                                                | 2 (1.2%)                                                | 2 (1.6%)                                                            |
| Mean dose (mg)                                                   | 900.0                                                   | 1080                                                                |
| Tacrolimus                                                       | 10 (6.1%)                                               | 9 (7.2%)                                                            |
| Mean dose (mg)                                                   | 3.9                                                     | 4.1                                                                 |

|                                  |            |            |
|----------------------------------|------------|------------|
| Methotrexate                     | 14 (8.6%)  | 7 (5.6%)   |
| Mean dose (mg)                   | 15.5       | 15.7       |
| Belimumab                        | 18 (11.0%) | 10 (8.0%)  |
| Cyclophosphamide within 6 months | 1 (0.6%)   | 0 (0%)     |
| Rituximab within 6 months        | 4 (2.5%)   | 3 (2.4%)   |
| Other*                           | 7 (4.3%)   | 8 (6.4%)   |
| Combination immunosuppressants   | 26 (16.0%) | 18 (14.4%) |

SLE, systemic lupus erythematosus; PCR, polymerase chain reaction; IgG, Immunoglobulin G; LN, lupus nephritis; mg (milligrams)

\*Other immunosuppressants included leflunomide, abatacept, adalimumab, obinutuzumab (within 6 months of vaccine), eculizumab, ravulizumab, voclosporin, tofacitinib and SLE clinical trial drug vs. placebo



**Appendix Table 2: Patients Hospitalized with COVID-19 Breakthrough Infection After Vaccination**

| Age | Gender | Lupus Medications                              | Initial Vaccine Type | Additional Vaccine Type | Date of Infection | Reason for Hospitalization    | COVID Treatment                                                         |
|-----|--------|------------------------------------------------|----------------------|-------------------------|-------------------|-------------------------------|-------------------------------------------------------------------------|
| 33  | Female | None                                           | Pfizer               | N/A                     | 1/17/22           | SOB, chest tightness, myalgia | Glucocorticoids, Remdesivir, Monoclonal Antibodies, Supplemental oxygen |
| 56  | Female | HCQ, Prednisone, Mycophenolic acid, Tacrolimus | J&J                  | 12/7/2021 (Pfizer)      | 1/24/22           | SOB                           | Supplemental oxygen                                                     |

HCQ, hydroxychloroquine; J&J, Johnson and Johnson; SOB, shortness of breath

**Appendix Table 3: Factors Associated with SARS-CoV-2 Spike Antibody Titer in SLE Patients After Additional COVID-19 Vaccination Dose**

|                                           | <b>Median (IQR)<br/>SARS-CoV-2<br/>Spike Ab after<br/>Additional<br/>Covid-19<br/>Vaccine Dose<br/>+</b> | <b>Median (IQR)<br/>SARS-CoV-2<br/>Spike Ab after<br/>Additional<br/>Covid-19<br/>Vaccine Dose<br/>-</b> | <b>P value</b> |
|-------------------------------------------|----------------------------------------------------------------------------------------------------------|----------------------------------------------------------------------------------------------------------|----------------|
| COVID-19 Breakthrough Infection           | 1135 (675-1378.5) (N=13)                                                                                 | 994.5 (436.25-1306.75) (N=44)                                                                            | 0.31           |
| Sex                                       |                                                                                                          |                                                                                                          |                |
| Female                                    | 1018.0 (448.75-1326.25) (N=54)                                                                           | 1250 (955-) (N=3)                                                                                        | 0.32           |
| Race                                      |                                                                                                          |                                                                                                          |                |
| White                                     | 1043.5 (787.5-1306.75) (N=20)                                                                            | 1036 (376.5-1364.5) (N=37)                                                                               | 0.44           |
| Ethnicity                                 |                                                                                                          |                                                                                                          |                |
| Hispanic/Latino                           | 1067.5 (840.75-1277.5) (N=16)                                                                            | 1036 (389.5-1376.5) (N=41)                                                                               | 0.74           |
| Initial mRNA COVID-19 vaccine             | 1018 (486-1350.75) (N=56)                                                                                | 1232 (1232-1232) (N=1)                                                                                   | 0.63           |
| History of LN                             | 945 (377.5-1231.5) (N=32)                                                                                | 1232 (741-1389) (N=25)                                                                                   | 0.072          |
| Medications at time of last vaccine N (%) |                                                                                                          |                                                                                                          |                |
| Hydroxychloroquine                        | 1039 (548-1326.25) (N=50)                                                                                | 920 (397-1391) (N=7)                                                                                     | 0.83           |
| Glucocorticoids                           | 945 (390.5-1274.5) (N=18)                                                                                | 1087 (607-1366) (N=39)                                                                                   | 0.42           |
| At least 1 immunosuppressant              | 934.5 (307.25-1241.75) (N=28)                                                                            | 1185 (811-1376) (N=29)                                                                                   | 0.071          |
| Glucocorticoids + immunosuppressant       | 934.5 (377.5-1230.5) (N=16)                                                                              | 1135 (627.5-1364.5) (N=41)                                                                               | 0.28           |
| Combination immunosuppressants            | 820.5 (167.5-1335.75) (N=8)                                                                              | 1042 (593-1338.5) (N=49)                                                                                 | 0.46           |

IQR, interquartile range; mRNA, messenger RNA; LN, lupus nephritis

**Figure 1: SARS-CoV-2 Infections in Initially Vaccinated SLE patients Among Those That Received and Did Not Receive an Additional COVID-19 Vaccine Dose**

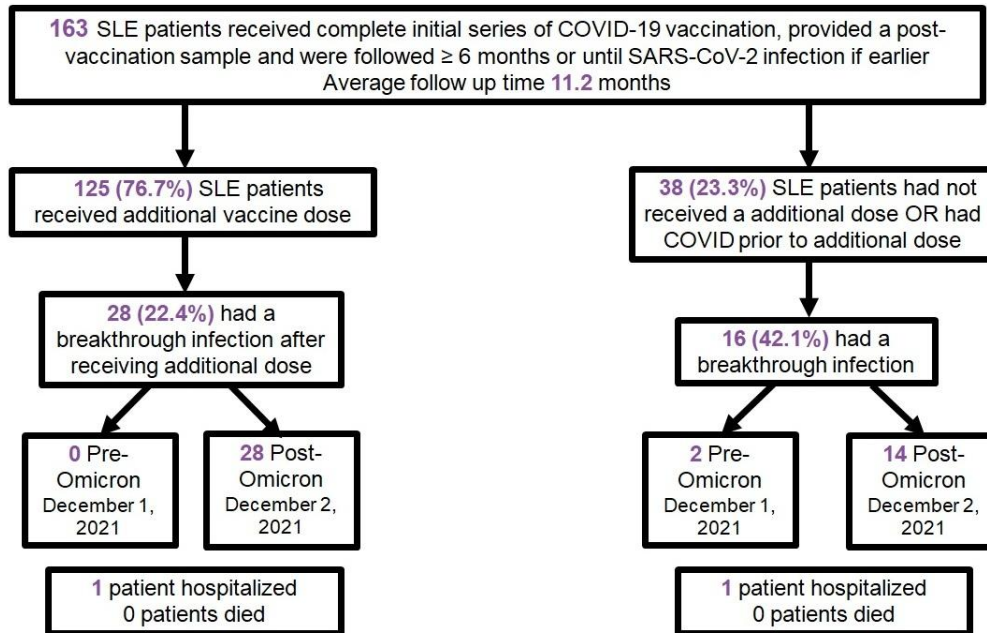

**Figure 2: SARS-CoV-2 spike antibody ELISA before and after initial COVID-19 vaccine series and additional dose**

**Time Point 1:**  
Pre-COVID  
vaccination

**Time Point 2:**  
Approximately  
1-month post-  
second  
vaccine dose  
(mean 34.1  
days after  
initial vaccine  
series in SLE  
patients)

**Time Point 3:**  
Prior to  
additional  
COVID-19  
vaccine dose  
(mean 181.5  
days after  
initial vaccine  
series in SLE  
patients)

**Time Point 4:**  
Approximately  
1-month post-  
booster (mean  
49.7 days after  
additional  
vaccine dose )

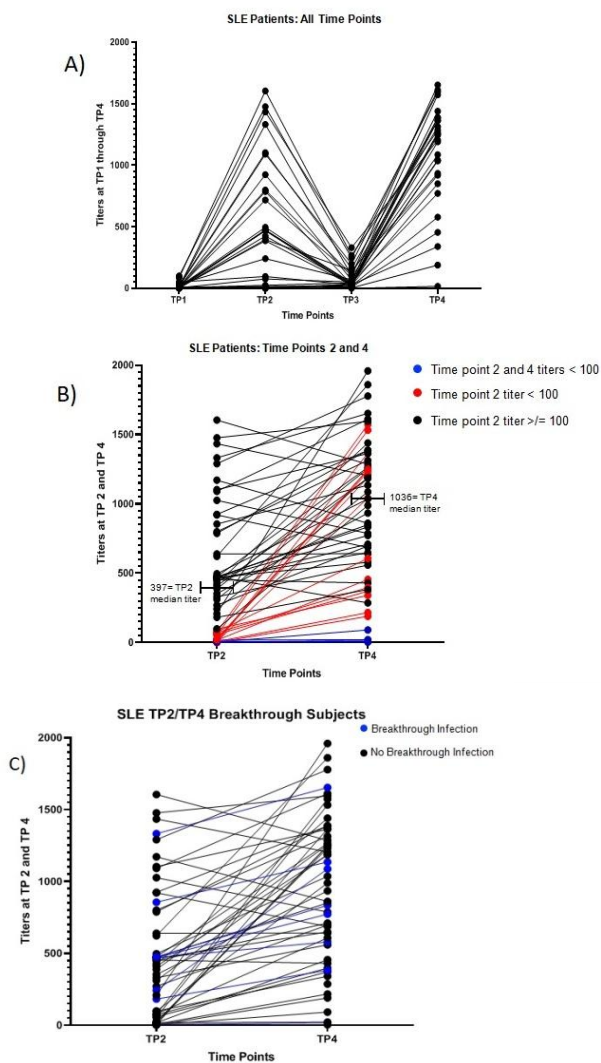

Supplement: mmc1.pdf [file mmc1.pdf]
